# Supplementary material for: Health Beliefs and Socioeconomic Determinants of COVID-19 Booster Vaccine Acceptance: An Indonesian Cross-Sectional Study
Source: MDPI journal article supplement (doi:10.3390/vaccines10050724), 2022-05-05
Supplement: s1 [file s1]

Table S1. Item list for health belief measures.

| Variables                                                                                                                                                                                                                                                                                                                                                                                                                                                                                                                                                                                                                 | Cronbach $\alpha$ |
|---------------------------------------------------------------------------------------------------------------------------------------------------------------------------------------------------------------------------------------------------------------------------------------------------------------------------------------------------------------------------------------------------------------------------------------------------------------------------------------------------------------------------------------------------------------------------------------------------------------------------|-------------------|
| <b>Perceived Threat</b>                                                                                                                                                                                                                                                                                                                                                                                                                                                                                                                                                                                                   |                   |
| <ul style="list-style-type: none"> <li>• It is likely that I will get ill from COVID-19</li> <li>• COVID-19 could possibly affect my health</li> <li>• I believe I am seriously at risk of getting ill from COVID-19</li> <li>• COVID-19 is harmful to my health</li> <li>• COVID-19 can severely affect my health</li> <li>• The health effects of COVID-19 infection are of serious concern</li> <li>• COVID-19 infection may cause me long-term health issues</li> <li>• COVID-19 infection may lead to my death</li> </ul>                                                                                            | 0.922             |
| <b>Perceived Barriers</b>                                                                                                                                                                                                                                                                                                                                                                                                                                                                                                                                                                                                 |                   |
| <ul style="list-style-type: none"> <li>• It's going to be difficult to get information regarding COVID-19 vaccine booster</li> <li>• It's going to be difficult to get information on where to get COVID-19 vaccine booster</li> <li>• It's going to be difficult to get scheduled for COVID-19 vaccine booster</li> <li>• It's going to be difficult for me to get transportation to reach the COVID-19 vaccine booster service locations</li> <li>• The COVID-19 vaccine booster service location would be too far from me</li> <li>• Healthcare providers would not help me to get COVID-19 vaccine booster</li> </ul> | 0.948             |
| <b>Perceived Harms</b>                                                                                                                                                                                                                                                                                                                                                                                                                                                                                                                                                                                                    |                   |
| <ul style="list-style-type: none"> <li>• COVID-19 vaccine boosters may cause serious short-term adverse events</li> <li>• COVID-19 vaccine boosters may cause long-term health issues</li> <li>• COVID-19 vaccine boosters may lead to long-term disabilities</li> <li>• COVID-19 vaccine boosters may lead to death</li> <li>• Boosters -related adverse events may disturb my work and employment</li> </ul>                                                                                                                                                                                                            | 0.926             |
| <b>Perceived Benefits</b>                                                                                                                                                                                                                                                                                                                                                                                                                                                                                                                                                                                                 |                   |
| <ul style="list-style-type: none"> <li>• Booster doses will significantly reduce risk of COVID-19 infection</li> <li>• Booster doses will significantly reduce risk of transmitting COVID-19 to others</li> <li>• Booster doses will significantly reduce risk of hospitalization with COVID-19</li> <li>• Booster doses will significantly reduce risk of long-term health issues caused by COVID-19</li> <li>• Booster doses will significantly reduce risk of death from COVID-19</li> </ul>                                                                                                                           | 0.945             |
