# Supplementary material for: Health Beliefs and Socioeconomic Determinants of COVID-19 Booster Vaccine Acceptance: An Indonesian Cross-Sectional Study
Source: MDPI journal article supplement (doi:10.3390/vaccines10050724), 2022-05-05
Supplement: s1 [file s1]

Table S2. Stratified multinomial logistic regression model for COVID-19 vaccine booster acceptance based on respondent's location.

| Variables                        | Jakarta (n = 1,894)               |                                  | Bali (n = 780)                    |                                  |
|----------------------------------|-----------------------------------|----------------------------------|-----------------------------------|----------------------------------|
|                                  | Planned to Accept<br>aOR (95% CI) | Already Accepted<br>aOR (95% CI) | Planned to Accept<br>aOR (95% CI) | Already Accepted<br>aOR (95% CI) |
| <b>Health Belief</b>             |                                   |                                  |                                   |                                  |
| <b>Perceived threat</b>          |                                   |                                  |                                   |                                  |
| Low                              | 1                                 | 1                                | 1                                 | 1                                |
| High                             | 1.72 (1.35 – 2.18)**              | 2.56 (1.69 – 3.88)**             | 1.53 (1.00 – 2.35)                | 2.02 (1.25 – 3.25)**             |
| <b>Perceived barriers</b>        |                                   |                                  |                                   |                                  |
| Low                              | 1                                 | 1                                | 1                                 | 1                                |
| High                             | 0.71 (0.55 – 0.91)**              | 0.28 (0.18 – 0.44)**             | 0.49 (0.31 – 0.78)**              | 0.29 (0.17 – 0.48)**             |
| <b>Perceived harms</b>           |                                   |                                  |                                   |                                  |
| Low                              | 1                                 | 1                                | 1                                 | 1                                |
| High                             | 0.43 (0.33 – 0.55)**              | 0.46 (0.29 – 0.72)**             | 0.63 (0.39 – 1.03)                | 0.51 (0.30 – 0.87)*              |
| <b>Perceived benefits</b>        |                                   |                                  |                                   |                                  |
| Low                              | 1                                 | 1                                | 1                                 | 1                                |
| High                             | 2.85 (2.22 – 3.66)**              | 1.99 (1.27 – 3.10)               | 2.66 (1.69 – 4.20)**              | 1.59 (0.95 – 2.64)               |
| <b>Media Influence and Trust</b> |                                   |                                  |                                   |                                  |
| <b>Influence of print media</b>  |                                   |                                  |                                   |                                  |
| Low                              | 1                                 | 1                                | 1                                 | 1                                |
| High                             | 1.71 (1.29 – 2.26)**              | 1.23 (0.77 – 1.97)               | 1.06 (0.63 – 1.77)                | 1.25 (0.71 – 2.19)               |
| <b>Influence of television</b>   |                                   |                                  |                                   |                                  |
| Low                              | 1                                 | 1                                | 1                                 | 1                                |
| High                             | 1.11 (0.79 – 1.56)                | 0.43 (0.24 – 0.77)**             | 1.37 (0.78 – 2.41)                | 1.03 (0.55 – 1.94)               |
| <b>Influence of radio</b>        |                                   |                                  |                                   |                                  |
| Low                              | 1                                 | 1                                | 1                                 | 1                                |
| High                             | 0.99 (0.76 – 1.31)                | 1.20 (0.76 – 1.90)               | 0.78 (0.48 – 1.27)                | 0.84 (0.49 – 1.43)               |
| <b>Influence of online media</b> |                                   |                                  |                                   |                                  |

|                                          |                      |                      |                      |                      |
|------------------------------------------|----------------------|----------------------|----------------------|----------------------|
| <b>Low</b>                               | 1                    | 1                    | 1                    | 1                    |
| <b>High</b>                              | 0.89 (0.61 – 1.29)   | 1.20 (0.65 – 2.23)   | 1.08 (0.55 – 2.13)   | 0.79 (0.37 – 1.67)   |
| <b>Influence of social media</b>         |                      |                      |                      |                      |
| <b>Low</b>                               | 1                    | 1                    | 1                    | 1                    |
| <b>High</b>                              | 1.96 (1.41 – 2.73)** | 1.75 (1.02 – 3.01)*  | 1.16 (0.65 – 2.07)   | 1.44 (0.76 – 2.73)   |
| <b>Trust in authoritative sources</b>    |                      |                      |                      |                      |
| <b>Low</b>                               | 1                    | 1                    | 1                    | 1                    |
| <b>High</b>                              | 1.33 (1.02 – 1.73)*  | 1.18 (0.76 – 1.84)   | 1.88 (1.19 – 2.98)** | 1.38 (0.82 – 2.33)   |
| <b>Demographics and COVID-19 History</b> |                      |                      |                      |                      |
| <b>Sex</b>                               |                      |                      |                      |                      |
| <b>Male</b>                              | 1                    | 1                    | 1                    | 1                    |
| <b>Female</b>                            | 1.18 (0.89 – 1.56)   | 0.81 (0.53 – 1.26)   | 1.15 (0.73 – 1.80)   | 1.17 (0.72 – 1.92)   |
| <b>Age (per incremental years)</b>       | 1.00 (0.99 – 1.01)   | 1.02 (1.00 – 1.05)   | 1.01 (0.99 – 1.04)   | 1.03 (1.01 – 1.06)*  |
| <b>Religion</b>                          |                      |                      |                      |                      |
| <b>Islam</b>                             | 1                    | 1                    | 1                    | 1                    |
| <b>Non-Islam</b>                         | 2.99 (1.92 – 4.66)** | 3.28 (1.88 – 6.39)** | 1.57 (0.99 – 2.48)   | 2.91 (1.68 – 5.05)** |
| <b>Education</b>                         |                      |                      |                      |                      |
| <b>Not completed high school</b>         | 0.92 (0.63 – 1.34)   | 0.46 (0.13 – 1.59)   | 0.27 (0.09 – 0.80)*  | 1.00 (0.30 – 3.39)   |
| <b>Completed high school</b>             | 1                    | 1                    | 1                    | 1                    |
| <b>Completed college</b>                 | 1.38 (1.03 – 1.86)*  | 3.95 (2.44 – 6.39)** | 1.33 (0.81 – 2.17)   | 2.50 (1.40 – 4.48)** |
| <b>Employment</b>                        |                      |                      |                      |                      |
| <b>Full-time employment</b>              | 1                    | 1                    | 1                    | 1                    |
| <b>Part-time employment</b>              | 0.88 (0.62 – 1.25)   | 0.44 (0.25 – 0.79)** | 0.61 (0.32 – 1.15)   | 0.45 (0.23 – 0.88)*  |
| <b>Student</b>                           | 0.71 (0.42 – 1.20)   | 0.57 (0.22 – 1.48)   | 0.74 (0.33 – 1.66)   | 0.27 (0.10 – 0.68)** |
| <b>Stay-at-home wife</b>                 | 0.76 (0.52 – 1.12)   | 0.16 (0.07 – 0.37)** | 0.72 (0.32 – 1.60)   | 0.11 (0.04 – 0.32)** |
| <b>Unemployed</b>                        | 0.70 (0.46 – 1.08)   | 0.20 (0.08 (0.49)**  | 0.47 (0.22 – 0.99)*  | 0.19 (0.08 – 0.44)** |
| <b>Monthly income</b>                    |                      |                      |                      |                      |
| <b>&lt; IDR 1 million</b>                | 1                    | 1                    | 1                    | 1                    |

|                                             |                      |                    |                    |                      |
|---------------------------------------------|----------------------|--------------------|--------------------|----------------------|
| <b>IDR 1 million – IDR 3 million</b>        | 1.10 (0.80 – 1.52)   | 0.98 (0.46 – 2.09) | 0.91 (0.50 – 1.65) | 0.56 (0.28 – 1.15)   |
| <b>IDR 3 million – IDR 5 million</b>        | 0.96 (0.68 – 1.37)   | 0.85 (0.39 – 1.86) | 1.11 (0.53 – 2.32) | 0.65 (0.27 – 1.52)   |
| <b>IDR 5 million</b>                        | 1.59 (1.02 – 2.46)** | 1.52 (0.66 – 3.50) | 1.41 (0.55 – 3.61) | 1.09 (0.39 – 3.01)   |
| <b>Health insurance</b>                     |                      |                    |                    |                      |
| <b>Subsidized public insurance</b>          | 1                    | 1                  | 1                  | 1                    |
| <b>Unsubsidized public insurance</b>        | 1.09 (0.82 – 1.44)   | 1.41 (0.84 – 2.36) | 1.30 (0.75 – 2.27) | 3.58 (1.83 – 7.02)** |
| <b>Private insurance</b>                    | 0.99 (0.74 – 1.31)   | 1.12 (0.65 – 1.93) | 0.60 (0.34 – 1.04) | 1.08 (0.54 – 2.17)   |
| <b>COVID-19 infection history</b>           |                      |                    |                    |                      |
| <b>Never infected</b>                       | 1                    | 1                  | 1                  | 1                    |
| <b>Infected, never hospitalized</b>         | 1.16 (0.79 – 1.73)   | 0.65 (0.35 – 1.23) | 1.53 (0.66 – 3.53) | 0.23 (0.05 – 1.23)   |
| <b>Infected and hospitalized</b>            | 0.83 (0.39 – 1.78)   | 0.74 (0.24 – 2.25) | 0.32 (0.07 – 1.44) | 1.04 (0.42 – 2.59)   |
| <b>COVID-19 infection in family/friends</b> |                      |                    |                    |                      |
| <b>No infection</b>                         | 1                    | 1                  | 1                  | 1                    |
| <b>Infection only</b>                       | 1.18 (0.84 – 1.65)   | 1.18 (0.68 – 2.07) | 1.15 (0.64 – 2.08) | 1.43 (0.76 – 2.67)   |
| <b>Hospitalization</b>                      | 0.99 (0.65 – 1.51)   | 1.30 (0.67 – 2.51) | 1.23 (0.66 – 2.29) | 0.95 (0.46 – 1.95)   |
| <b>Mortality</b>                            | 1.17 (0.84 – 1.63)   | 1.56 (0.94 – 2.60) | 1.50 (0.78 – 2.89) | 1.51 (0.72 – 3.15)   |

\*p &lt; 0.05; \*\*p &lt; 0.01
